# Supplementary material for: The influence of acylation, metal binding and natural antioxidants on the thermal stability of red cabbage anthocyanins in neutral solution
Source: Royal Society of Chemistry journal article supplement (doi:10.1039/c9fo01884k), 2019-01-01
Supplement: c9fo01884k1.pdf [file c9fo01884k1.pdf]

*Supplementary Information*

**The influence of acylation, metal binding and natural antioxidants  
on the thermal stability of red cabbage anthocyanins in neutral  
solution**

Julie-Anne Fenger, Micheal Moloney, Rebecca J. Robbins, Tom M. Collins,  
Olivier Dangles\*

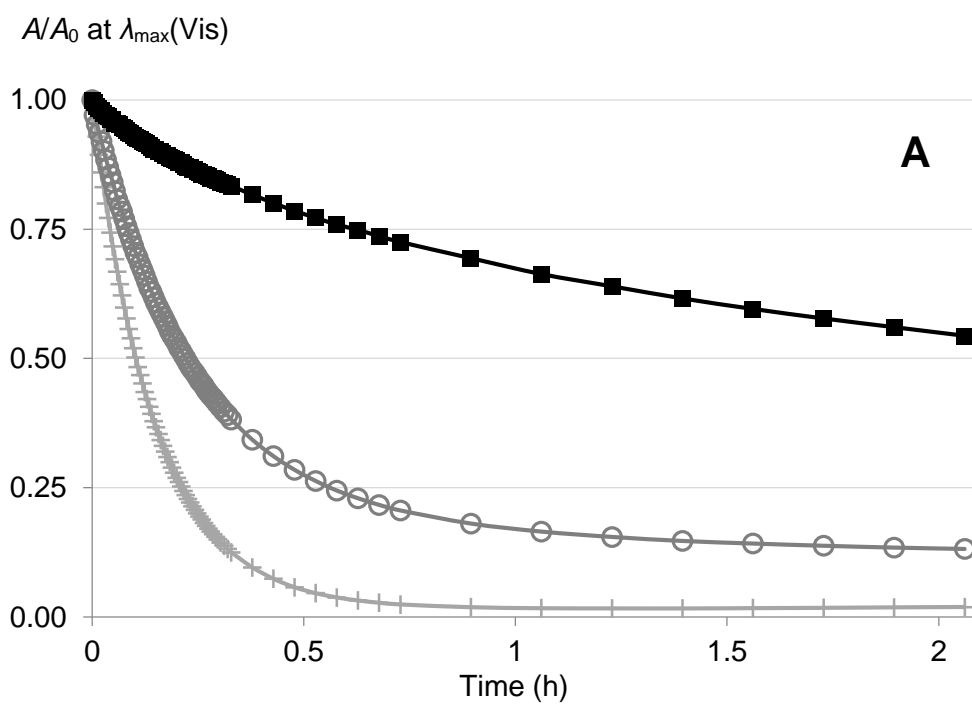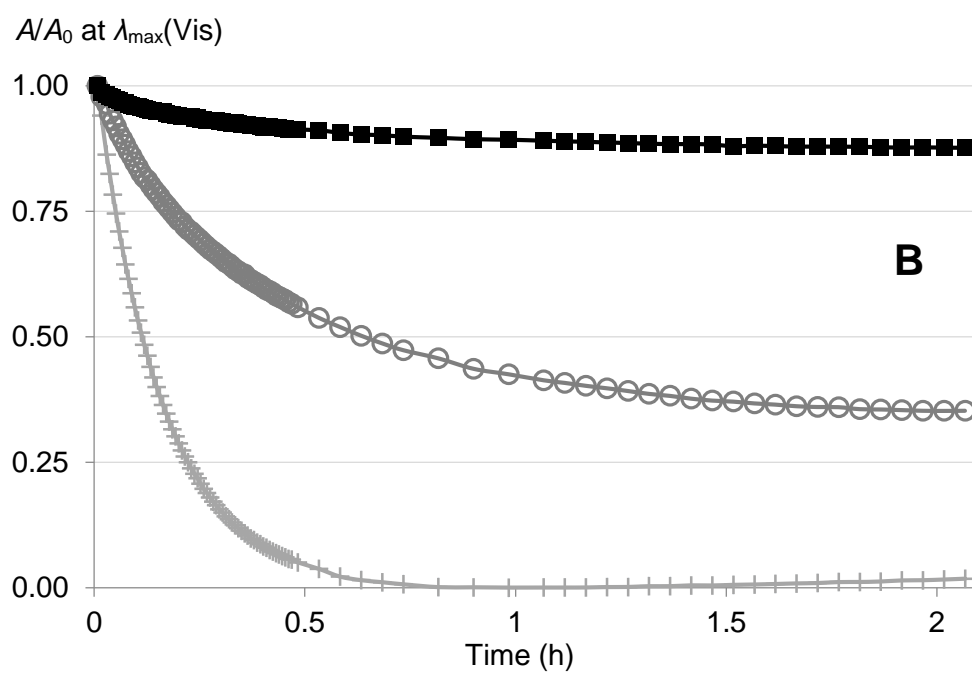

**Fig. 1-SI** Spectroscopic monitoring of color loss at pH 7, 50°C. **A:** Pigment A (+), P1 (○), P4 (■), **B:** same pigments in the presence of 0.6 equiv.  $\text{Fe}^{2+}$ .

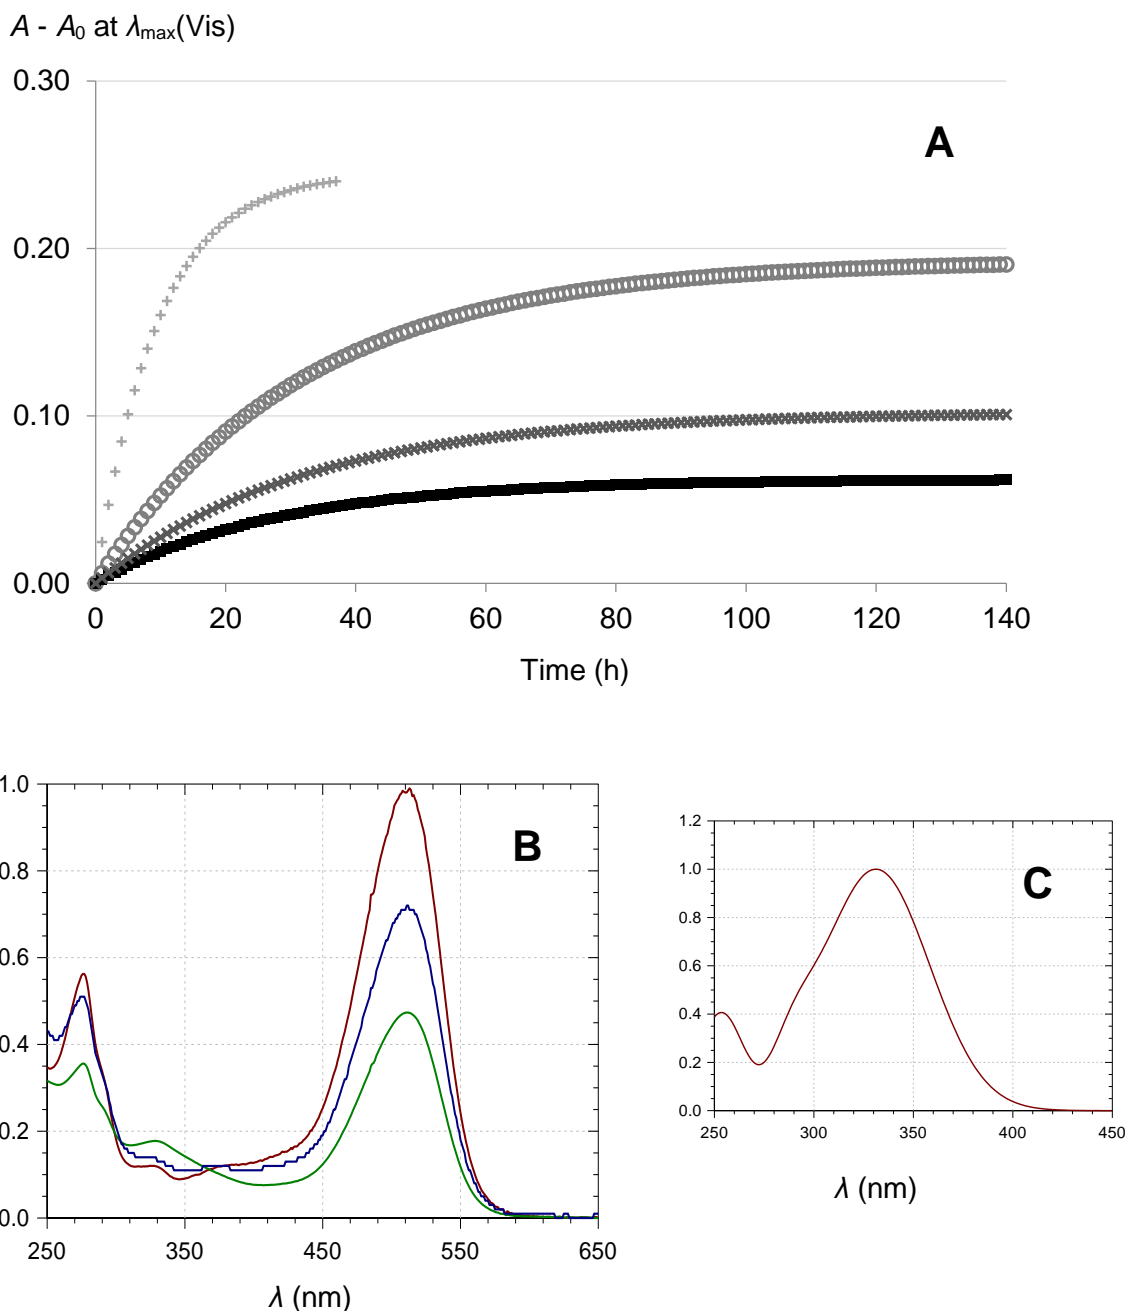

**Fig. 2-SI** **A:** The slow conversion of the *trans*-chalcone to flavylum ion (25°C) after acidification to pH 1-2 of samples uptaken after a 2h period of thermal treatment at pH 7, 50°C.  $A_0$  = absorbance immediately after acidification. PA (+), P1 ( $\circ$ ), P4 ( $\blacksquare$ ), RCE (X). First-order curve fitting gives:  $k_{\text{obs}}$  ( $\times 10^{-3}$ ,  $\text{h}^{-1}$ ) =  $106.0 \pm 2.3$  (PA),  $31.7 \pm 0.1$  (P1),  $37.4 \pm 0.6$  (P4) and  $31.4 \pm 0.7$  (RCE). **B:** —: intact pigment A (control, pure flavylum), —: sample immediately after acidification (flavylum + Ct + degradation products), —: sample after incubation for 48h (flavylum + degradation products). **C:** Normalized spectrum of the *trans*-chalcone deduced from the spectra of part B.

| Simulation | $k_{DA} / \text{h}^{-1}$ | $k_{DB} / \text{h}^{-1}$ | $k_h / \text{h}^{-1}$ | $k_{-h} / \text{h}^{-1}$ | $Q_h$ |
|------------|--------------------------|--------------------------|-----------------------|--------------------------|-------|
| 1          | 0.5                      | 0                        | 10                    | 1                        | 10    |
| 2          | 0.5                      | 0.5                      | 10                    | 1                        | 10    |
| 3          | 0.5                      | 0.05                     | 10                    | 0.1                      | 100   |

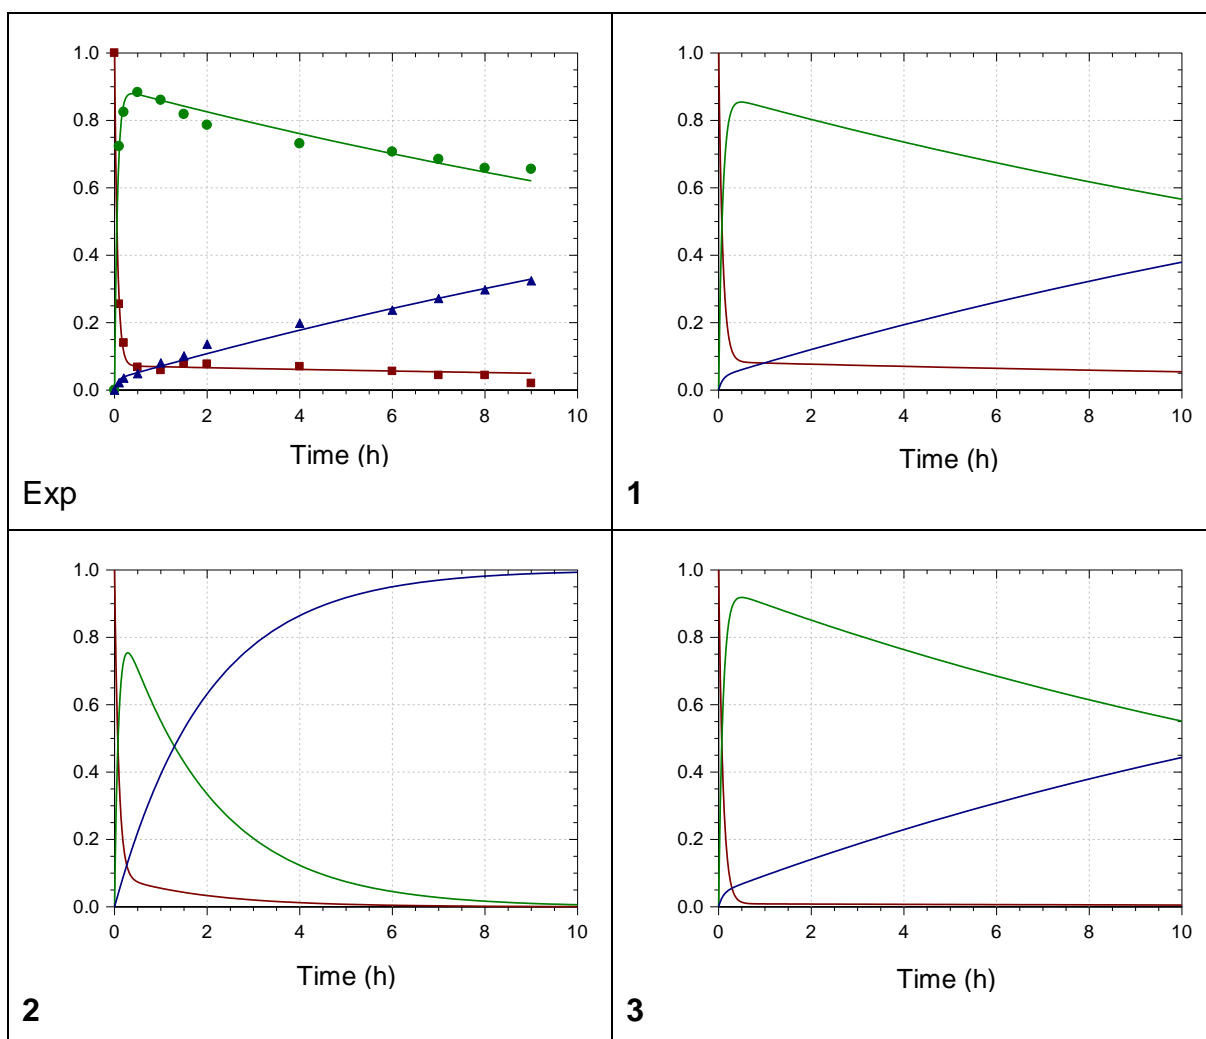

**Fig. 3-SI** Kinetic simulations for the degradation of pigment A at pH 7, 50°C. First graph: curve-fitting of the experimental data. Graphs 1-3: simulations from parameters reported in Table.  $X_h$ : —,  $X_h$ : —,  $X_d$ : —.

| Simulation | $k_{DA} / \text{h}^{-1}$ | $k_{DB} / \text{h}^{-1}$ | $k_h / \text{h}^{-1}$ | $k_{-h} / \text{h}^{-1}$ | $Q_h$ |
|------------|--------------------------|--------------------------|-----------------------|--------------------------|-------|
| 1          | 0.08                     | 0                        | 0.14                  | 0.2                      | 0.7   |
| 2          | 0.08                     | 0.08                     | 0.14                  | 0.2                      | 0.7   |
| 3          | 0.08                     | 0.008                    | 0.08                  | 0.01                     | 8     |

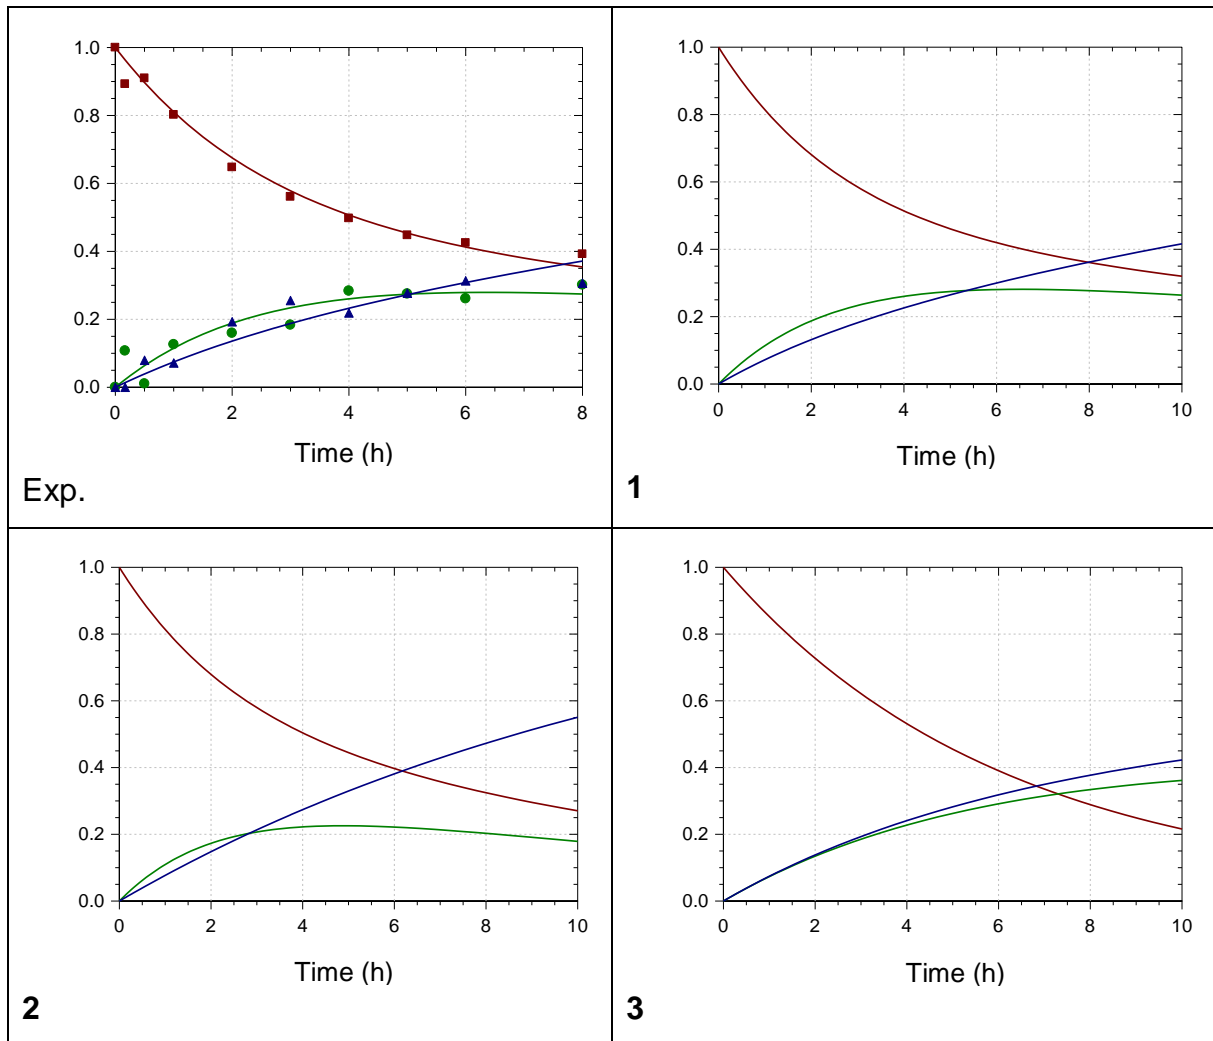

**Fig. 4-SI** Kinetic simulations for the degradation of P4 at pH 7, 50°C. First graph: curve-fitting of the experimental data. Graphs 1-3: simulations from parameters reported in Table.  $X_h$ : —,  $X_d$ : —,  $X_n$ : —.

**Table 1-SI** Apparent rate constants and amplitudes of color loss at pH 7 deduced from mono- or biexponential curve-fitting ( $r > 0.999$ ).

|                                                                           | <b>Pigment A</b>    | <b>P1</b>                                               | <b>P4</b>                                               |
|---------------------------------------------------------------------------|---------------------|---------------------------------------------------------|---------------------------------------------------------|
| $k_{\text{obs}}$ ( $\text{h}^{-1}$ ), 25°C                                | -                   | 1.42 ( $\pm 0.06$ ) <sup>a</sup><br>0.11 ( $\pm 0.03$ ) | 0.32 ( $\pm 0.02$ ) <sup>a</sup><br>0.04 ( $\pm 0.01$ ) |
| $\Delta A$ , 25°C                                                         | -                   | 0.66 ( $\pm 0.02$ )<br>0.12 ( $\pm 0.02$ )              | 0.199 ( $\pm 0.009$ )<br>0.35 ( $\pm 0.01$ )            |
| $k_{\text{obs}}$ ( $\text{h}^{-1}$ ), 50°C                                | 6.89 ( $\pm 0.01$ ) | 4.05 ( $\pm 0.03$ )                                     | 0.80 ( $\pm 0.02$ )<br>8.1 ( $\pm 0.5$ )                |
| $\Delta A$ , 50°C                                                         | 0.98 ( $\pm 0.01$ ) | 0.85 ( $\pm 0.01$ )                                     | 0.49 ( $\pm 0.01$ )<br>0.06 ( $\pm 0.01$ )              |
| $k_{\text{obs}}$ ( $\text{h}^{-1}$ ), Fe <sup>2+</sup> (0.6 equiv.), 50°C | 6.19 ( $\pm 0.04$ ) | 2.55 ( $\pm 0.02$ )                                     | -                                                       |
| $\Delta A$ , Fe <sup>2+</sup> (0.6 equiv.), 50°C                          | <i>ca.</i> 1        | 0.64 ( $\pm 0.01$ )                                     | <i>ca.</i> 0.1                                          |

<sup>a</sup> Calculated  $k_{\text{obs}}$  values (pure hydration) at 25°C = 0.195 (P1) and 0.064 (P4)  $\text{h}^{-1}$ .
